# Supplementary material for: Dual emission from stoichiometrically mixed lanthanide complexes of 3-phenyl-4-benzoyl-5-isoxazolonate and 2,2′-bipyridine
Source: Royal Society of Chemistry journal article supplement (doi:10.1039/b809563a), 2009-01-01
Supplement: b809563a.pdf [file b809563a.pdf]

## Supporting Information

### Dual emission from stoichiometrically mixed lanthanide complexes of 3-phenyl-4-benzoyl-5-isoxazolonate and 2,2'-bipyridine

Silvanose Biju<sup>†</sup>, D. B. Ambili Raj<sup>†</sup>, M. L. P. Reddy<sup>†\*</sup>, C. K. Jayasankar,<sup>#</sup> Alan H. Cowley<sup>‡</sup> and Michael Findlater<sup>‡</sup>

<sup>†</sup>Chemical Sciences and Technology Division, National Institute for Interdisciplinary Science & Technology (NIIST), Thiruvananthapuram-695 019, India

<sup>#</sup>Department of Physics, Sri Venkateswara University, Tirupathi-517 502, India

<sup>‡</sup>Department of Chemistry and Biochemistry, The University of Texas at Austin, 1 University Station A5300, Austin, Texas 78712

E-mail: [mlpreddy55@gmail.com](mailto:mlpreddy55@gmail.com)

### Contents

1. EDS spectra of the complex **1**
2. EDS spectra of the complex **2**
3. EDS spectra of the complex **3**
4. EDS analysis results for the complexes **1-3** (Table S1)
5. XRD patterns for the complexes **1-6**
6. Thermo gravimetric curve for complexes **1-6**
7. Hydrogen bonding interactions in **5**
8. UV-vis absorption and excitation spectra
9. Direct excited emission spectra of complexes **1-3**
10. Decay profile of complexes **1-6**

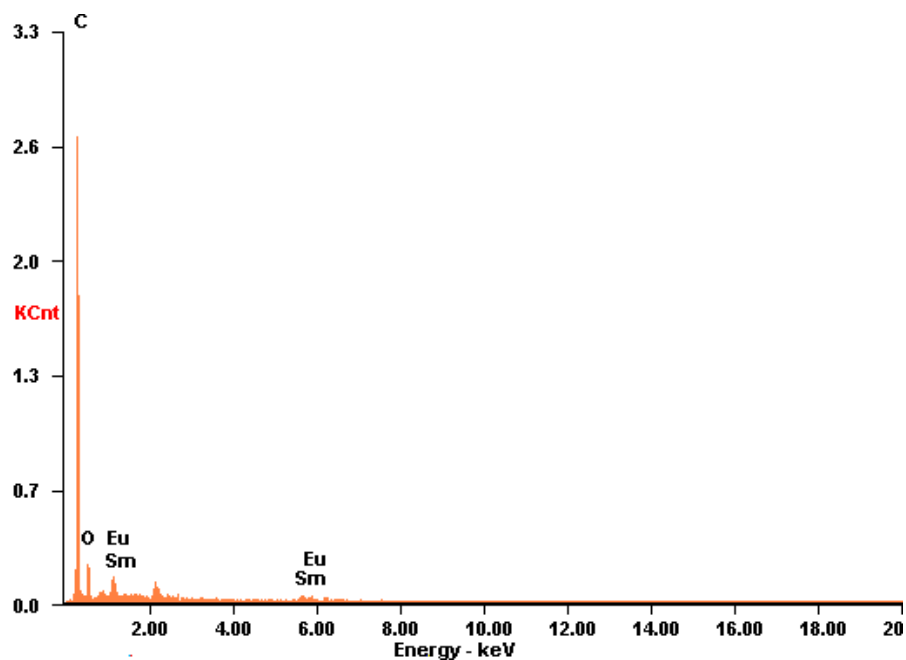

Fig. S1 X-Ray energy dispersive spectrum from the multy-crystal powder complex 1.

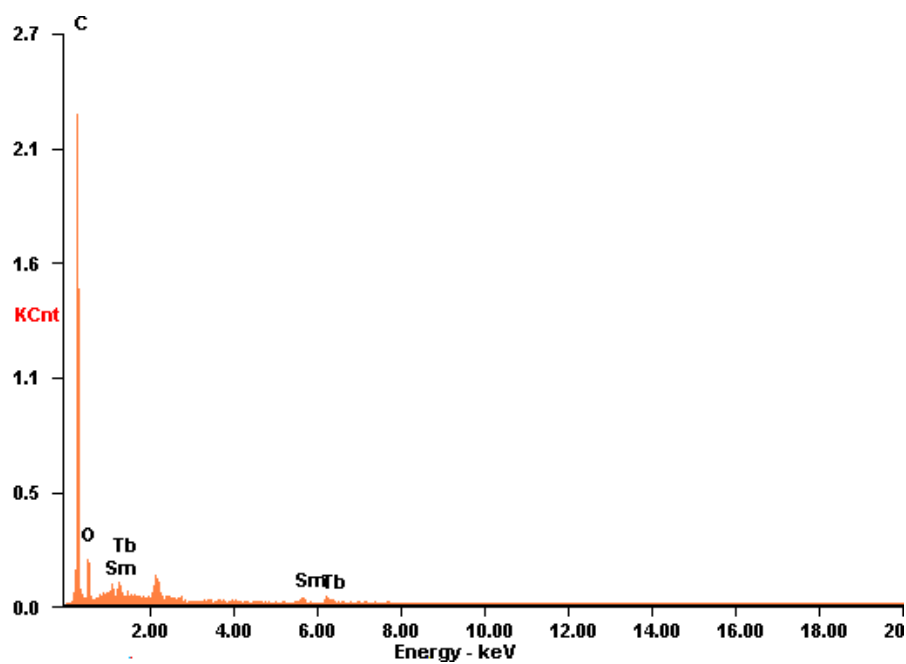

Fig. S2 X-Ray energy dispersive spectrum from the multy-crystal powder complex 2.

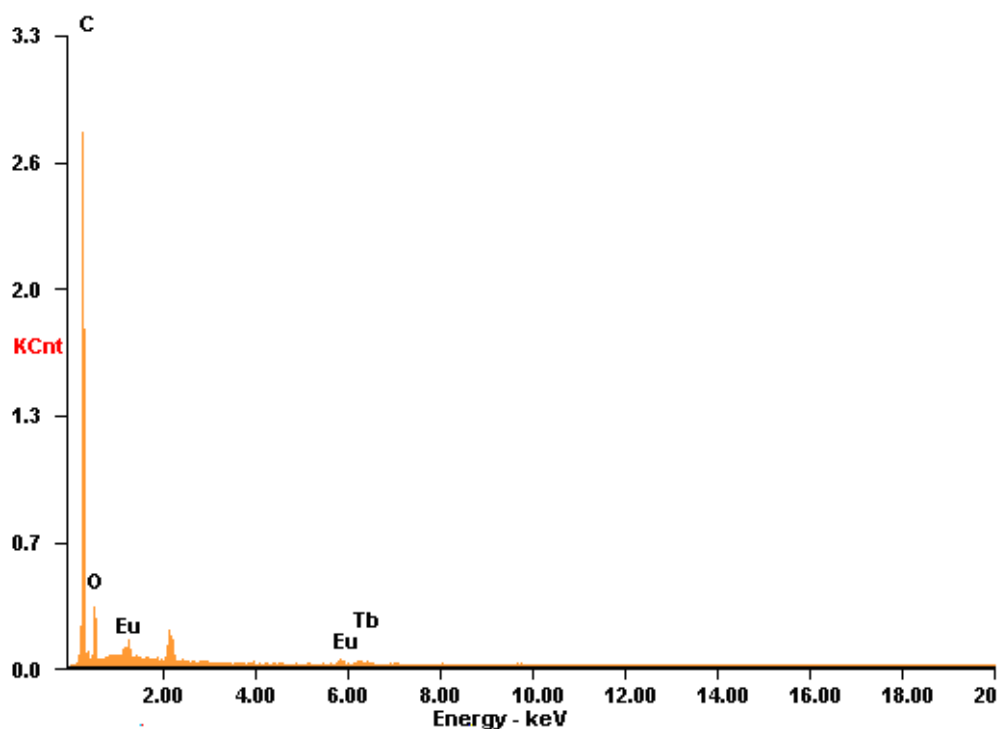

Fig. S3 X-Ray energy dispersive spectrum from the multi-crystal powder complex 3.

Table S1 EDS analysis results for the complexes 1-3

|   | Element | at %  | wt%   | Ln/Ln<br>(EDS) | Ln/Ln<br>(Calcd.) |
|---|---------|-------|-------|----------------|-------------------|
| 1 | CK      | 91.28 | 73.25 |                |                   |
|   | OK      | 6.84  | 7.41  |                |                   |
|   | SmL     | 0.93  | 9.51  | 0.97           | 1                 |
|   | EuL     | 0.95  | 9.74  |                |                   |
| 2 | CK      | 90.63 | 73.70 |                |                   |
|   | OK      | 7.64  | 8.38  |                |                   |
|   | SmL     | 0.86  | 8.91  | 0.99           | 1                 |
|   | TbL     | 0.87  | 9.01  |                |                   |
| 3 | CK      | 89.97 | 74.25 |                |                   |
|   | OK      | 8.49  | 9.33  |                |                   |
|   | TbL     | 0.76  | 8.31  |                |                   |
|   | EuL     | 0.78  | 8.11  | 0.99           | 1                 |

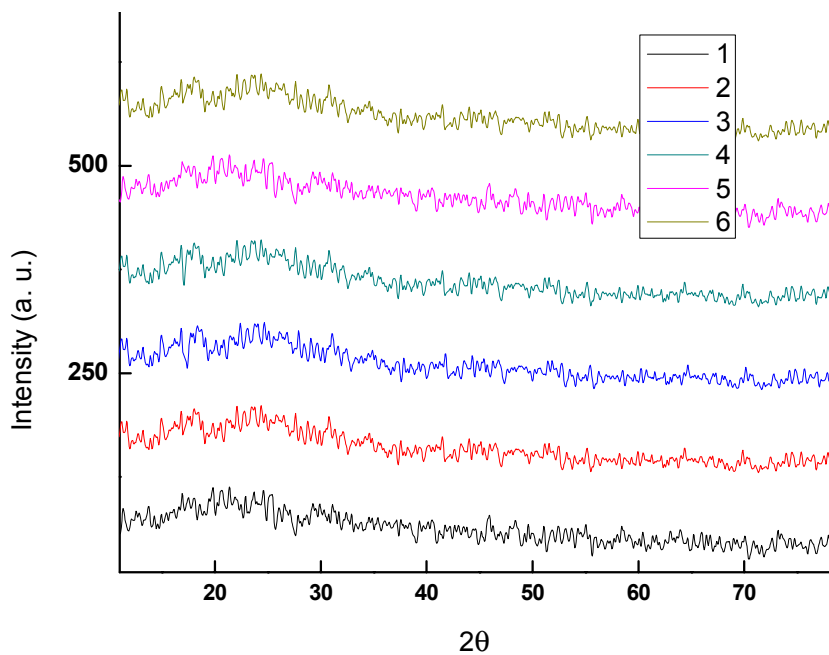

Fig. S4 XRD patterns for the complexes 1-6.

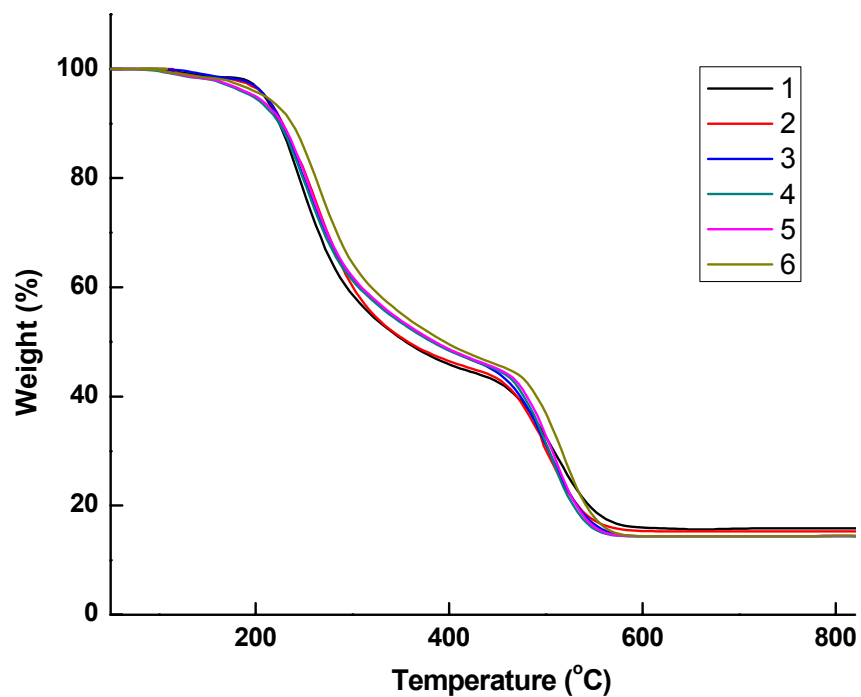

Fig. S5 Thermo gravimetric curve for complexes 1-6.

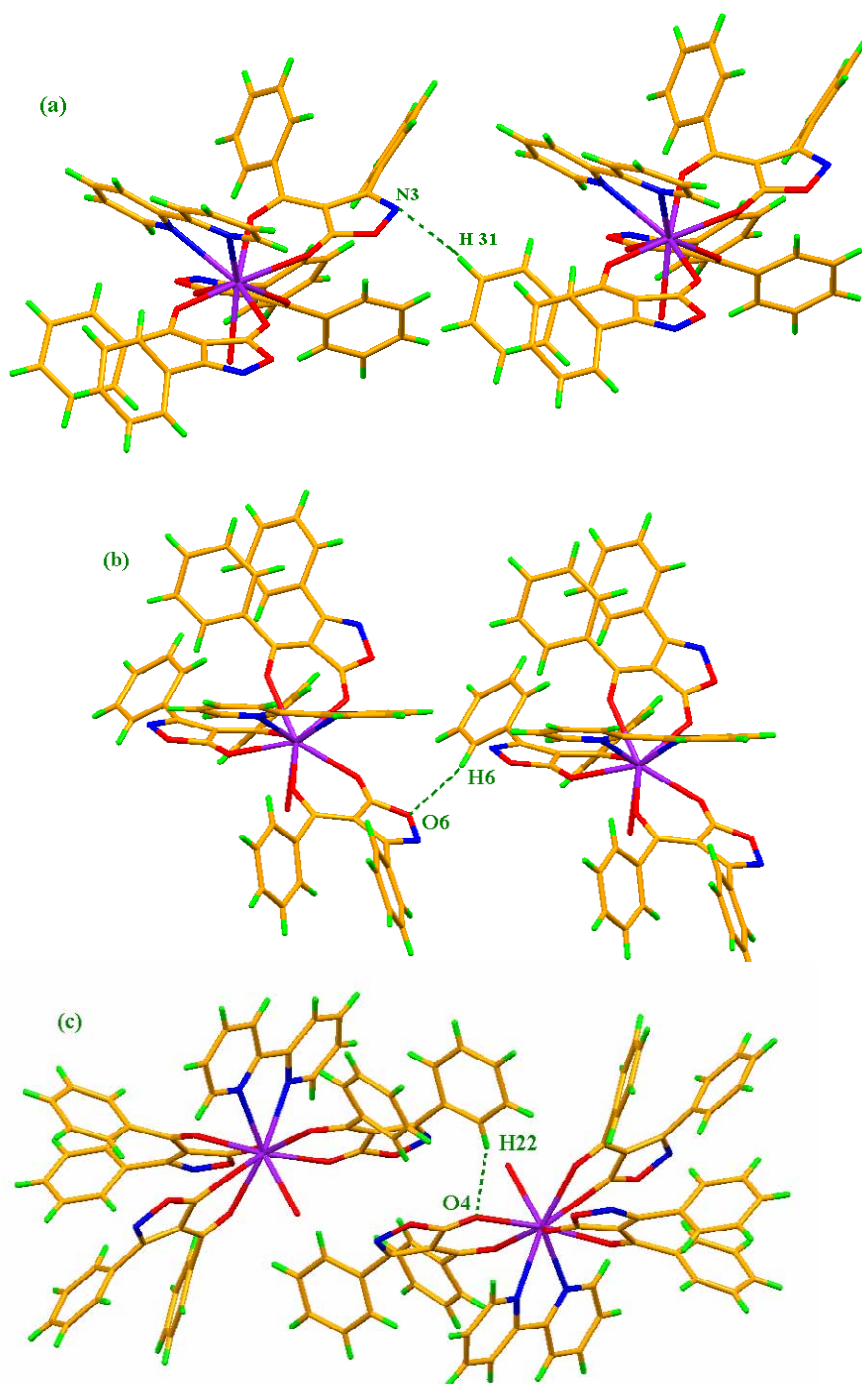

**Fig. S6** Intermolecular hydrogen bonding interactions in **5**. The N3 in (a) is at equivalent position  $(x, 1+y, z)$ , the O6 in (b) is at equivalent position  $(1+x, y, z)$ , and the O4 in (c) is at equivalent position  $(-x, 1-y, 1-z)$ .

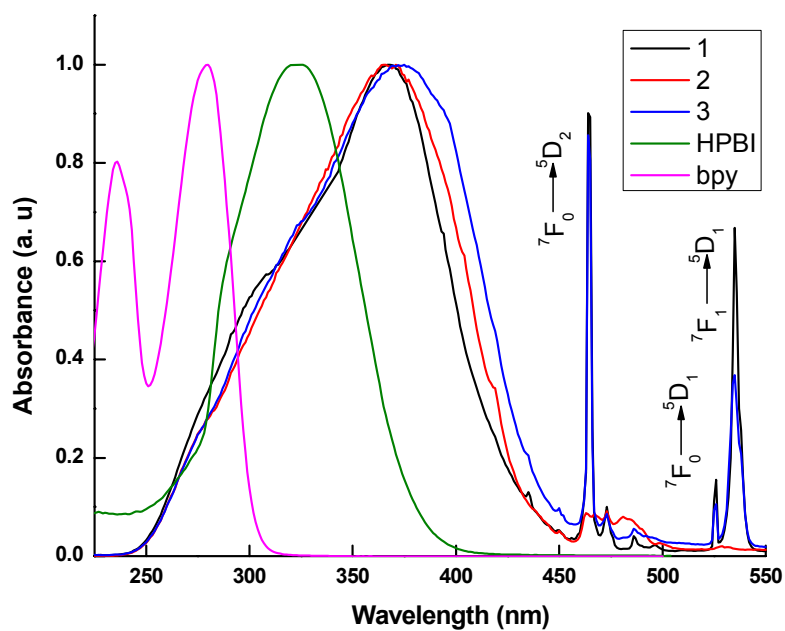

**Fig. S7** Excitation spectra of complexes 1-3 and UV-vis absorption spectra of HPBI and bpy ligands; The complexes are in solid state, and the ligands are at  $2 \times 10^{-5}$  M in  $\text{CH}_3\text{-CN}$ . All spectra are normalized to a constant intensity at the maximum.

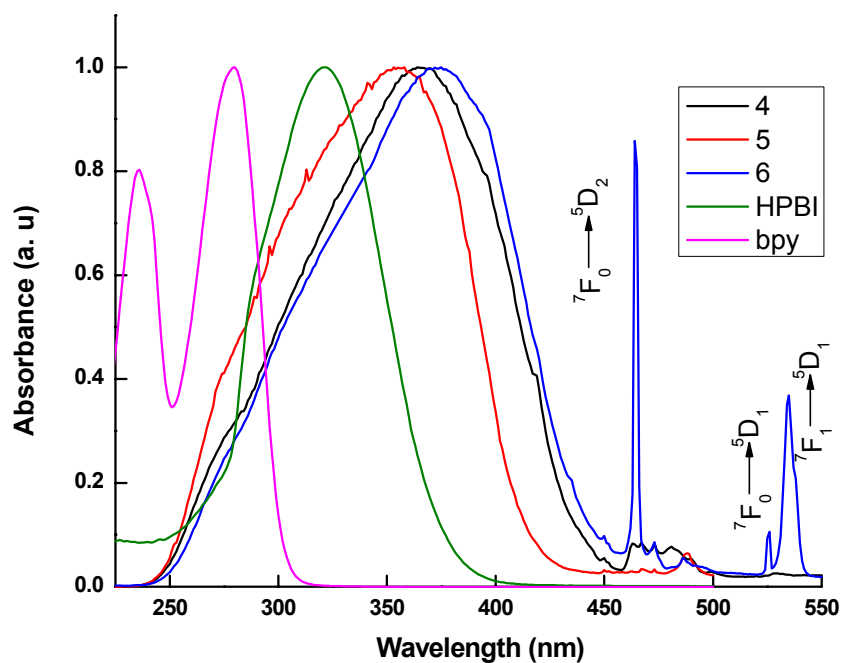

**Fig. S8** Excitation spectra of complexes 4-6 and UV-vis absorption spectra of HPBI and bpy ligands; the complexes are in solid state, and the ligands are at  $2 \times 10^{-5}$  M in  $\text{CH}_3\text{-CN}$ . All spectra are normalized to a constant intensity at the maximum.

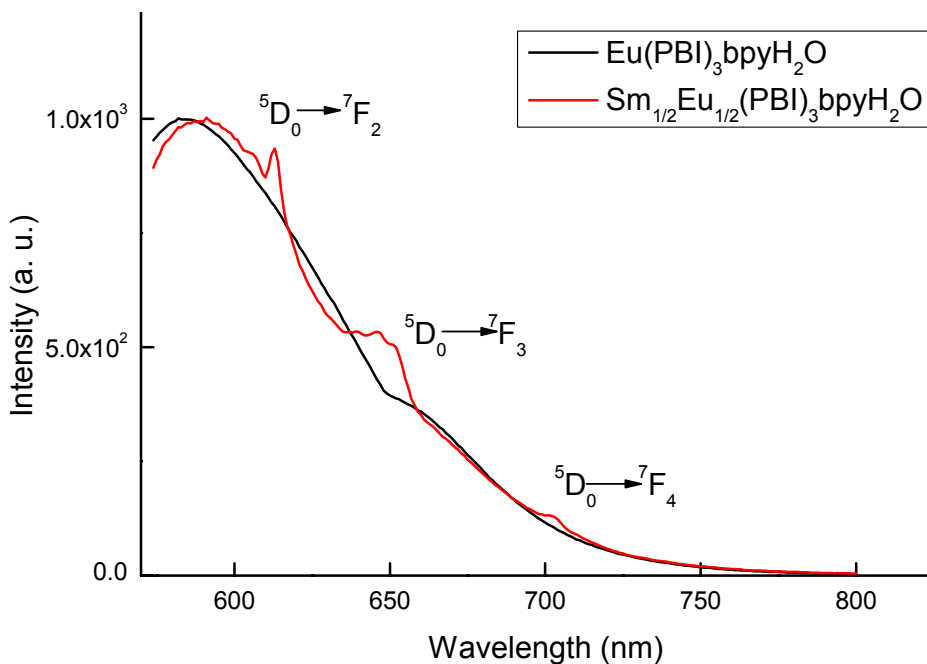

**Fig. S9** Emission spectra of the complexes **1** and **5** ( $\lambda_{\text{ex}} = 564\text{nm}$ ).

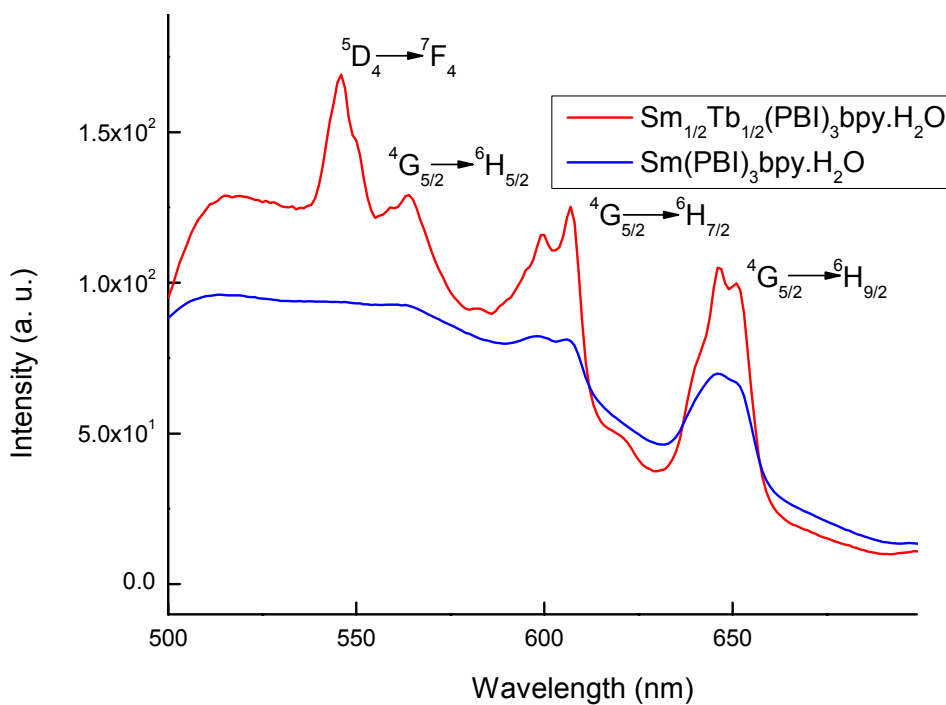

**Fig. S10** Emission spectra of the complexes **2** and **4** ( $\lambda_{\text{ex}} = 488$  nm).

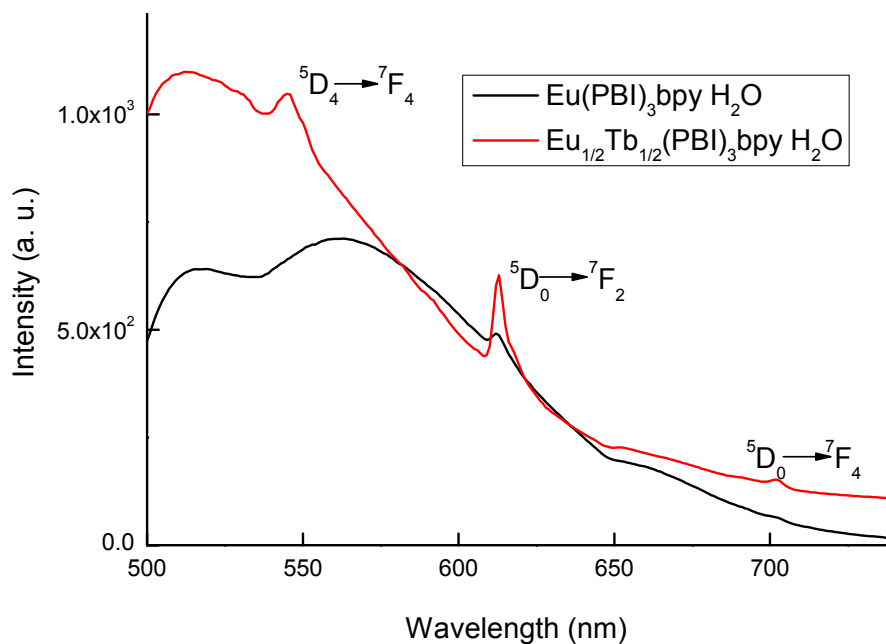

**Fig. S11** Emission spectra of the complexes **3** and **5** ( $\lambda_{\text{ex}} = 488$  nm).

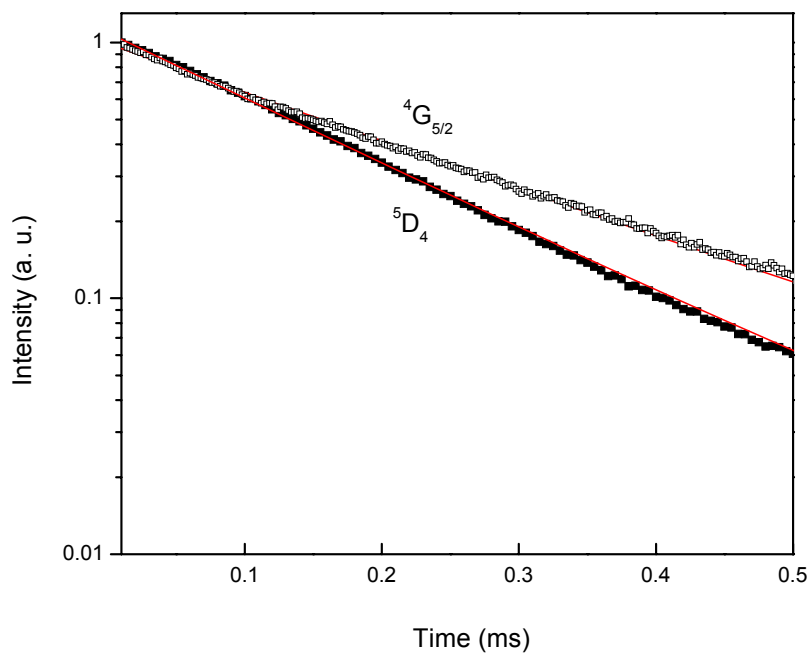

**Fig. S12**  ${}^5\text{D}_4$  and  ${}^4\text{G}_{5/2}$  decay profile complexes **2** excited at 370 nm and emission monitored around 546 nm for  ${}^5\text{D}_4$  and 645 nm for  ${}^4\text{G}_{5/2}$ . The straight lines are the best fits ( $r^2 = 0.99$ ) considering single-exponential behaviour.



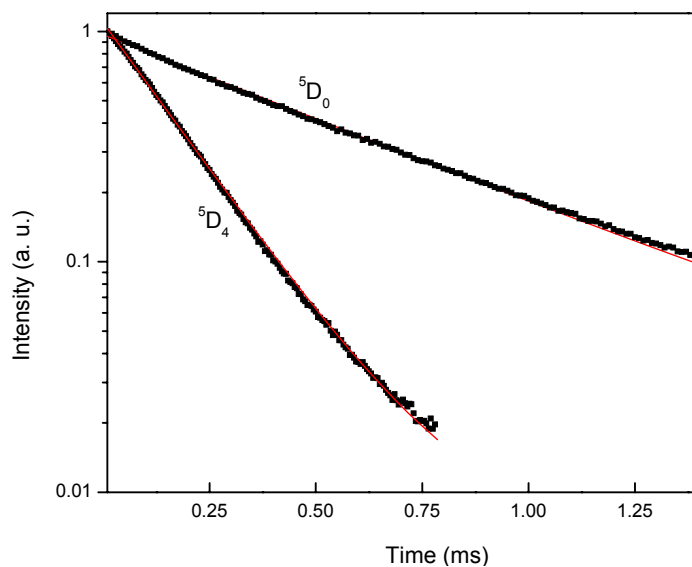

**Fig. S13**  $^5D_0$  and  $^5D_4$  decay profile complexes **3** excited at 370 nm and emission monitored around 613 for  $^5D_0$  and 546 nm for  $^5D_4$ . The straight lines are the best fits ( $r^2 = 0.99$ ) considering single-exponential behaviour for  $^5D_0$  and bi-exponential behaviour for  $^5D_4$ .

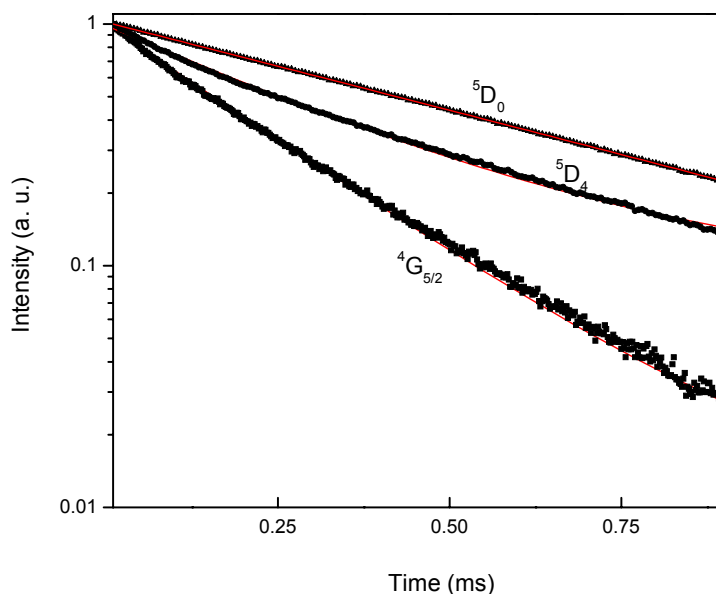

**Fig. S14**  $^5D_0$ ,  $^5D_4$  and  $^4G_{5/2}$  decay profiles of complexes **4-6**, excited at their maximum intensity emission wavelengths and emission monitored around 613 for  $^5D_0$ , 546 for  $^5D_4$  and 646 nm for  $^4G_{5/2}$ . The straight lines are the best fits ( $r^2 = 0.99$ ) considering single exponential behaviour.
